# Supplementary material for: Enzyme-conjugated ZnO nanocrystals for collisional quenching-based glucose sensing
Source: Royal Society of Chemistry journal article supplement (doi:10.1039/c2ce06410c), 2012-01-01
Supplement: c2ce06410c.pdf [file c2ce06410c.pdf]

**Supplementary Information for**  
**Enzyme-conjugated ZnO nanocrystals for collisional**  
**quenching-based glucose sensing**

Ki-Eun Kim,<sup>a</sup> Tae Geun Kim,<sup>b</sup> and Yun-Mo Sung<sup>a,\*</sup>

*<sup>a</sup>Department of Materials Science and Engineering, Korea University, Seoul 136-713, South Korea*

*<sup>b</sup>Department of Electrical Engineering, Korea University, Seoul 136-713, South Korea*

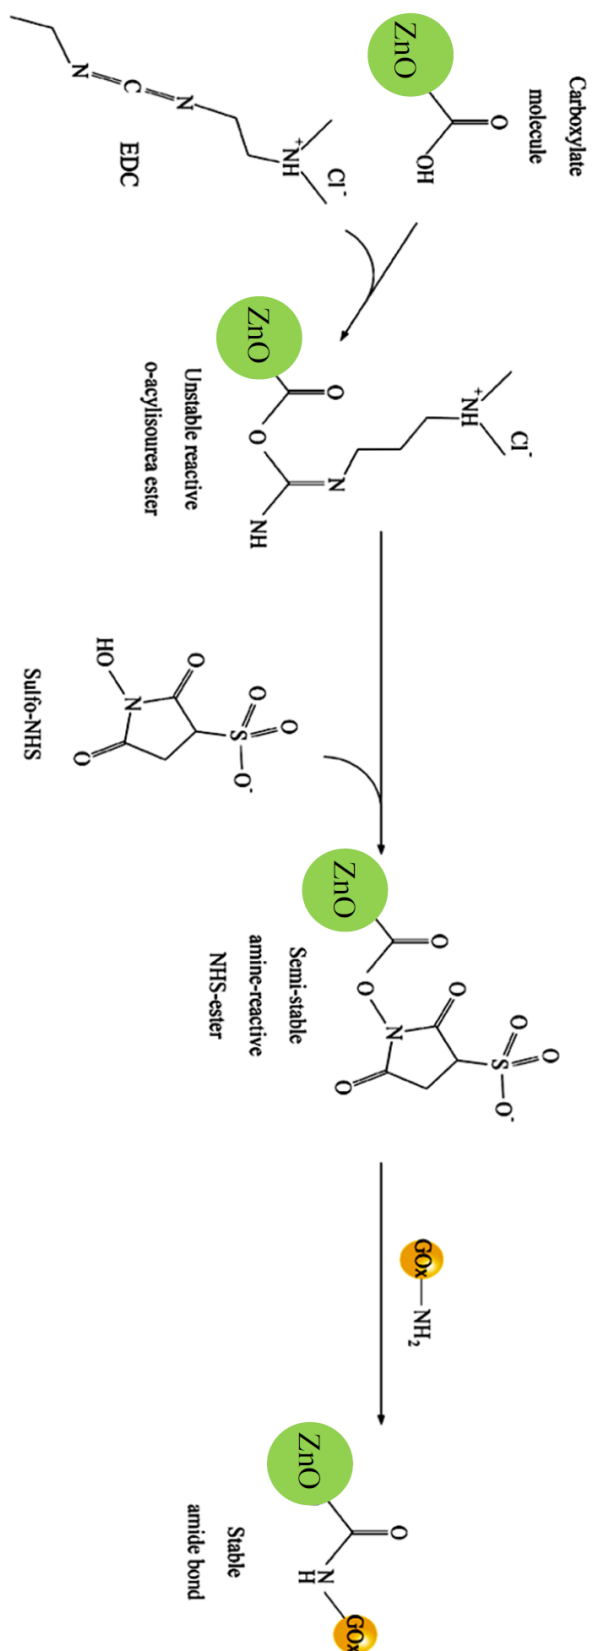

ES1. Detail procedure showing ZnO-MUA-GOx bioconjugates.
